# Supplementary material
Source: PubMed Central journal article supplement (PMC5010803)
Supplement: 10815_2016_744_MOESM1_ESM.pdf [file 10815_2016_744_MOESM1_ESM.pdf]

**Supplemental Table 1.****Prediction of clinical pregnancy (either ended as early pregnancy loss or live birth) and live birth by given cut-off values of sequential application for POD 12 hCG- $\beta$  and its fold change between POD 12 and 14 (January 2012 to December 2014 at the IVF Clinic of Cheil General Hospital).**

| Pregnancy outcome          | Sequential application                               |                                  | Sensitivity (%) | Specificity (%) | PPV (%) | NPV (%) | OR (95% CI)           | P value |
|----------------------------|------------------------------------------------------|----------------------------------|-----------------|-----------------|---------|---------|-----------------------|---------|
|                            | Given cut-off of Initial hCG- $\beta$ level (mIU/mL) | Given cut-off of increase (fold) |                 |                 |         |         |                       |         |
| <b>Fresh cycles</b>        |                                                      |                                  |                 |                 |         |         |                       |         |
| Clinical pregnancy         | < 30.2                                               | 2.85                             | 65.0            | 75.2            | 62.9    | 76.8    | 5.625 (3.734-8.474)   | <0.001  |
|                            | $\geq$ 30.2                                          | 2.56                             | 69.1            | 59.4            | 96.5    | 10.7    | 3.263 (1.573-6.770)   | 0.001   |
| Live birth                 | < 40.5                                               | 2.87                             | 71.0            | 67.5            | 47.1    | 85.2    | 5.098 (3.449-7.533)   | <0.001  |
|                            | $\geq$ 40.5                                          | 2.79                             | 61.0            | 63.2            | 59.7    | 64.5    | 2.691 (2.081-3.481)   | <0.001  |
| <b>Frozen-thawed cycle</b> |                                                      |                                  |                 |                 |         |         |                       |         |
| Clinical pregnancy         | < 31.5                                               | 2.51                             | 76.5            | 75.7            | 68.8    | 82.2    | 10.166 (5.545-18.639) | <0.001  |
|                            | $\geq$ 31.5                                          | 2.38                             | 82.2            | 66.7            | 95.4    | 30.9    | 9.224 (4.702-18.093)  | <0.001  |
| Live birth                 | < 43.5                                               | 2.72                             | 83.3            | 63              | 35.7    | 93.9    | 8.519 (3.958-18.333)  | <0.001  |
|                            | $\geq$ 43.5                                          | 2.56                             | 84.3            | 38.6            | 71.3    | 57.4    | 3.359 (1.705-6.617)   | <0.001  |
